# Supplementary material
Source: PubMed Central journal article supplement (PMC6643423)
Supplement: ao8b02455_si_001.pdf [file ao8b02455_si_001.pdf]

**Ionic Liquids Based Catanionic Coacervates: The Novel Microreactors for  
Membrane Free Sequestration of Dyes and Curcumin**

Ankit Shah<sup>a</sup>, Muzammil Kuddushi<sup>a</sup>, Sargam Rajput<sup>a</sup>, Omar A. El Seoud<sup>b</sup>, Naved  
I. Malek<sup>a\*</sup>

<sup>a</sup>Applied Chemistry Department, S. V. National Institute of Technology, Surat-395007, Gujarat,  
India

<sup>b</sup>Institute of Chemistry, The University of Sao Paulo, 748 Prof. Lineu Prestes Av., Sao  
Paulo, SP 05508-000, Brazil.

**Table SI-1:** Sodium Salicylate induced Structural Transition in various surfactants.

| Sr no | Surfactant                                                                           | $R = [\text{NaSal}] / [\text{Surfactant}]$ | Transition* | Ref |
|-------|--------------------------------------------------------------------------------------|--------------------------------------------|-------------|-----|
| 1     | Cetyltrimethylammonium Chloride                                                      | 1.0                                        | STT         | 1   |
| 2     | Cetyltrimethylammonium Bromide                                                       | 1.0                                        | STT         | 2,3 |
|       |                                                                                      | 1.2                                        | STW         | 4   |
|       |                                                                                      | 0.96                                       | STR         | 5,6 |
| 3     | N-cetyl-N-(2-hydroxyethyl) dimethylammonium bromide                                  | 0.4 to 1.0                                 | STW         | 7   |
| 4     | N-cetyl-N,N-di(2-hydroxyethyl) methylammonium bromide                                | 0.4 to 1.0                                 | STW         | 7   |
| 5     | Star-typetrimeric surfactants                                                        | 0.24 to 0.30                               | STR         | 8   |
|       |                                                                                      | $0.45 \leq R \leq 0.66$                    | STW         |     |
|       |                                                                                      | $R > 0.79$                                 | STV         |     |
| 6     | Ethanediy- $\alpha,\omega$ -bis(dimethyldodecyl ammonium bromide) (12-2-12)          | $R > 0.96$                                 | STV         | 8   |
| 8     | N-tetradecyl-N-(2-hydroxyethyl) dimethylammonium bromide                             | 0.70                                       | STW         | 9   |
| 9     | 1,2-bis[N-ethyl-N-(sodium 2-hydroxyl-3-sulfopropyl)-dodecyl-ammonium] ethane betaine | $\leq 0.3$                                 | STW         | 10  |
|       |                                                                                      | 0.8                                        | STLW        |     |
| 10    | Didecyldimethylammoniumformate                                                       | 0.25                                       | WTV         | 11  |
|       |                                                                                      | 0.43                                       | STW         |     |

|    |                                                                               |                              |     |    |
|----|-------------------------------------------------------------------------------|------------------------------|-----|----|
| 11 | N-methyl-N-cetylpyrrolidinium<br>bromide                                      | 0.4<br><br>(40 mM/100<br>mM) | STG | 12 |
| 12 | hexanediyl- $\alpha,\omega$ -bis(dimethylcetyl<br>ammonium bromide) (16-6-16) | 1.8                          | STW | 13 |

\*STT = Spherical micelle to Threadlike Micelle, STR = Spherical micelle to Rodlike Micelle, STW = Spherical micelle to Wormlike Micelle, STLW = Spherical micelle to Long Wormlike Micelle, STV = Spherical micelle to Vesicles, STG = Spherical micelle to Hydrogel, WTV= Wormlike micelle to vesicle.

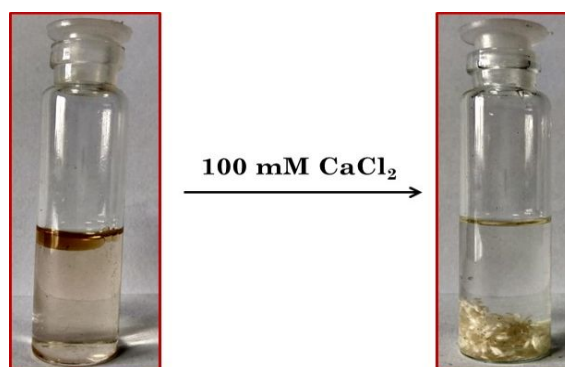

**Figure SI-1.** Visual Images of Complex coacervates before and after addition of 100 mM of  $\text{CaCl}_2$ . (Photograph courtesy of ‘Ankit Shah’)

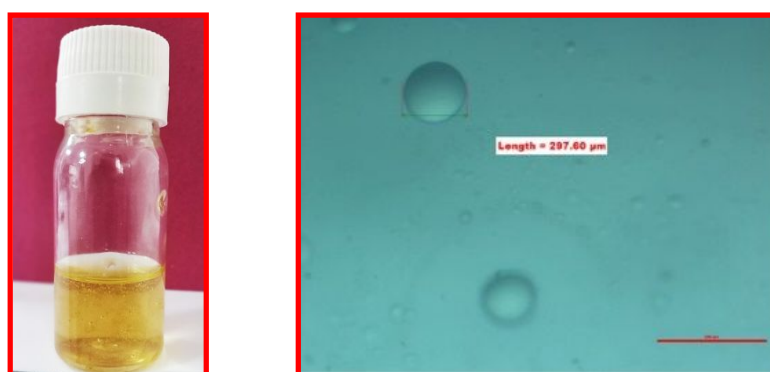

**Figure SI-2.** Visual and Optical microscopy images of the complex coacervates with  $\text{C}_8\text{EMeImBr}$  (112.5mM) and  $\text{NaSal}$  (100 mM) in the presence of 0.15 % w/v of  $\text{NaAlg}$  (Scale bar = 500  $\mu\text{m}$ ). (Photograph courtesy of ‘Ankit Shah’)

## References

1. Wang, Z.; Larson, R.G. Molecular Dynamics Simulations of Threadlike Cetyltrimethylammonium Chloride Micelles: Effects of Sodium Chloride and Sodium Salicylate Salts. *J. Phys. Chem. B* **2009**, *113*, 13697–13710.
2. Mohanty, S.; Davis, H. T.; McCormick, A. V. Stratification in Drying Films Containing Bidisperse Mixtures of Nanoparticles. *Langmuir*, **2001**, *17*, 7160–7171.

3. Shikata, T.; Hirata, H.; Kotaka, T. Micelle formation of detergent molecules in aqueous media. 2. Role of free salicylate ions on viscoelastic properties of aqueous cetyltrimethylammonium bromide-sodium salicylate solutions. *Langmuir*, **1988**, *4*, 354–359.
4. Peia, X.; Zhao, J.; Wei, X. Comparative study of the viscoelastic wormlike micellar solutions of hexanediyl- $\alpha,\omega$ -bis(dimethylcetylammmonium bromide) and cetyltrimethylammonium bromide in the presence of sodium salicylate, *Colloids and Surfaces A: Physicochem. Eng. Aspects*, **2010**, *366*, 203–207.
5. Aswal, V.K.; Goyal, P.S.; Thiyagarajan, P. Small-Angle neutron-scattering and viscosity studies of CTAB/NaSal viscoelastic micellar solutions. *J Phys Chem B*, **1998**, *102*, 2469–2473.
6. Lin, C.; Zhao, J. Nile red probing for sphere-to-rod-to-wormlike micelle transition in aqueous surfactant solution. *Dyes and Pigments*, **2010**, *84*, 223–228.
7. Dai, C.; Wu, X.; Li, W.; You, Q.; Zhao, M.; Du, M.; Liu, Y.; Li, Y. The role of hydroxyethyl groups in the construction of wormlike micelles in the system of quaternary ammonium surfactant and sodium salicylate. *Soft Matter*, **2015**, *11*, 7817–7820.
8. Kusano, T.; Akutsu, K.; Iwase, H.; Yoshimura, T.; Shibayama, M. Structural study on aggregation behavior of star-type trimeric surfactant in the presence of sodium salicylate. *Colloids and Surfaces A: Physicochem. Eng. Aspects*, **2016**, *497*, 109–116.
9. Dai, C.; Lia, W.; Cui, Y.; Sun, Y.; Wu, W.; Xu, Z.; Liu, Y.; Yang, Z.; Wu, X. The effect of functional groups on the sphere-to-wormlike micellar transition in quaternary ammonium surfactant solutions. *Colloids and Surfaces A: Physicochem. Eng. Aspects*, **2016**, *500*, 32–39.
10. Xiang, F.; Geng Q.; Xing Q.; Hu C.; Xue C.; Jia J.L.; Li J. L. Effects of sodium salicylate on the microstructure of a novel zwitterionic gemini surfactant and its rheological responses. *Colloid Polym Sci*, **2014**, *292*, 915–921.
11. Zhao, L.; Zhang, H.; Wang, W.; Wang, G. Effects of sodium salicylate on didecyldimethylammonium formate properties and aggregation behaviors, *J Mol. Liq.* **2017**, *225*, 897–902.

12. Yana, H.; Zhaoa, M.; Zheng, L. A hydrogel formed by cetylpyrrolidinium bromide and sodium salicylate. *Colloids and Surfaces A: Physicochem. Eng. Aspects*, **2011**, *392*, 205–212.
13. Manohar, C.; Rao, U.R.K.; Valaulikar, B.S.; Lyer, R.M. On the origin of viscoelasticity in micellar solutions of cetyltrimethylammonium bromide and sodium salicylate. *J. Chem. Soc. Chem. Commun.* **1986**, *5*, 379–381.
